# Supplementary material for: Impact of the Food-Related Stress Conditions on the Expression of Enterotoxin Genes among Staphylococcus aureus
Source: MDPI journal article supplement (doi:10.3390/pathogens12070954), 2023-07-19
Supplement: s1 [file s1]

**Table S1.** ANI values among tested strains

|                       | <i>S. aureus</i> 35 G | <i>S. aureus</i> 36 G | <i>S. aureus</i> 39 G | <i>S. aureus</i> 45 G | <i>S. aureus</i> 47 G |
|-----------------------|-----------------------|-----------------------|-----------------------|-----------------------|-----------------------|
| <i>S. aureus</i> 35 G | 100                   | 98.84                 | 99.96                 | 98.83                 | 98.85                 |
| <i>S. aureus</i> 36 G | 98.84                 | 100                   | 98.85                 | 98.91                 | 98.78                 |
| <i>S. aureus</i> 39 G | 99.96                 | 98.85                 | 100                   | 98.87                 | 98.96                 |
| <i>S. aureus</i> 45 G | 98.83                 | 98.91                 | 98.87                 | 100                   | 98.88                 |
| <i>S. aureus</i> 47 G | 98.85                 | 98.78                 | 98.96                 | 98.88                 | 100                   |

**Table S2.** Statistical significance between expressions after exposure to tested stressor among each strains based on Kruskal-Wallis ANOVA test.

| stress factors | 35G      | 39G      | 36G | 45G | 47G      |
|----------------|----------|----------|-----|-----|----------|
| pH=9.6         | 0.00273  | 0.001872 | na  | na  | 0.00511  |
| pH=4.5         | 0.002808 | 0.001872 | na  | na  | 0.003129 |
| 4.5% NaCl      | 0.002063 | 0.002041 | na  | na  | 0.00267  |

na- not applicable ,  $p < 0.05$

**Table S3.** Statistical significance between expressions each genes after exposure to tested stressor based on Kruskal-Wallis ANOVA test.

| Gene        | <i>p</i> -value |
|-------------|-----------------|
| <i>sea</i>  | 0.06081         |
| <i>seg</i>  | 0.019734*       |
| <i>sei</i>  | 0.003207*       |
| <i>selm</i> | 0.000288*       |
| <i>seln</i> | 0.024283*       |
| <i>selo</i> | 0.000215*       |
| <i>selu</i> | 0.101489        |
| <i>selp</i> | 0.84896         |

\*significant differences,  $p < 0.05$
